# Supplementary material for: Comparison of molybdenum and rhenium oxo bis-pyrazine-dithiolene complexes – in search of an alternative metal centre for molybdenum cofactor models
Source: Royal Society of Chemistry journal article supplement (doi:10.1039/c8dt04237c), 2019-01-01
Supplement: c8dt04237c1.pdf [file c8dt04237c1.pdf]

## Supporting Information

---

### Comparing Molybdenum and Rhenium Oxo Bis-Pyrazine-Dithiolene Complexes – In Search of an Alternative Metal Center for Molybdenum Cofactor Models

Nicolas Chrysochos,<sup>a</sup> Mohsen Ahmadi,<sup>a</sup> Stefan Malte Wahlefeld,<sup>b</sup> Yvonne Rippers,<sup>b</sup>  
Ingo Zebger,<sup>b</sup> Maria Andrea Mroginski,<sup>b</sup> Carola Schulzke<sup>\*,a</sup>

<sup>a</sup>*Institut für Biochemie, Universität Greifswald, Felix-Hausdorff-Straße 4, 17487  
Greifswald, Germany*

<sup>b</sup>*Institut für Chemie, Physikalische Chemie/Biophysikalische Chemie, Technische  
Universität Berlin, Germany*

\*E-Mail: carola.schulzke@uni-greifswald.de

---

Table S1: Redox potentials ( $E_{1/2}^0$ ) vs.  $Fc/Fc^+$  for the redox transition  $M^{IV} \leftrightarrow M^V$  for IIa  $[MoO(pdt)_2]^{2-}$  and IIb  $[ReO(pdt)_2]^-$  at various temperatures between 278.15 K and 338.15 K.

| T [K]  | IIa [MoO(pdt) <sub>2</sub> ] <sup>2-</sup> [V] |       |       | IIb [ReO(pdt) <sub>2</sub> ] <sup>-</sup> [V] |       |       |
|--------|------------------------------------------------|-------|-------|-----------------------------------------------|-------|-------|
| 278.15 | -0.5                                           | -0.51 | -0.52 | -2.07                                         | -2.06 | -1.92 |
| 283.15 | -0.52                                          | -0.51 | -0.52 | -2.07                                         | -2.06 | -2.06 |
| 288.15 | -0.48                                          | -0.5  | -0.51 | -2.07                                         | -2.08 | -1.94 |
| 293.15 | -0.52                                          | -0.5  | -0.51 | -2.08                                         | -2.09 | -2.11 |
| 298.15 | -0.48                                          | -0.45 | -0.45 | -2.24                                         | -1.98 | -1.94 |
| 298.15 | -0.52                                          | -0.5  | -0.51 | -2.09                                         | -2.08 | -2.06 |
| 303.15 | -0.52                                          | -0.49 | -0.5  | -2.09                                         | -2.11 | -2.14 |
| 308.15 | -0.48                                          | -0.45 | -0.46 | -2.24                                         | -2.02 | -1.96 |
| 313.15 | -0.51                                          | -0.49 | -0.51 | -2.1                                          | -2.12 | -2.15 |
| 318.15 | -0.48                                          | -0.47 | -0.47 | -2.24                                         | -2.07 | -1.96 |
| 323.15 | -0.5                                           | -0.49 | -0.5  | -2.1                                          | -2.13 | -2.15 |
| 328.15 | -0.48                                          | -0.46 | -0.47 | -2.2                                          | -2.09 | -2.01 |
| 333.15 | -0.5                                           | -0.48 | -0.49 | -2.12                                         | -2.12 | -2.15 |
| 338.15 | -0.49                                          | -0.46 | -0.48 | -2.15                                         | -2.11 | -2.09 |

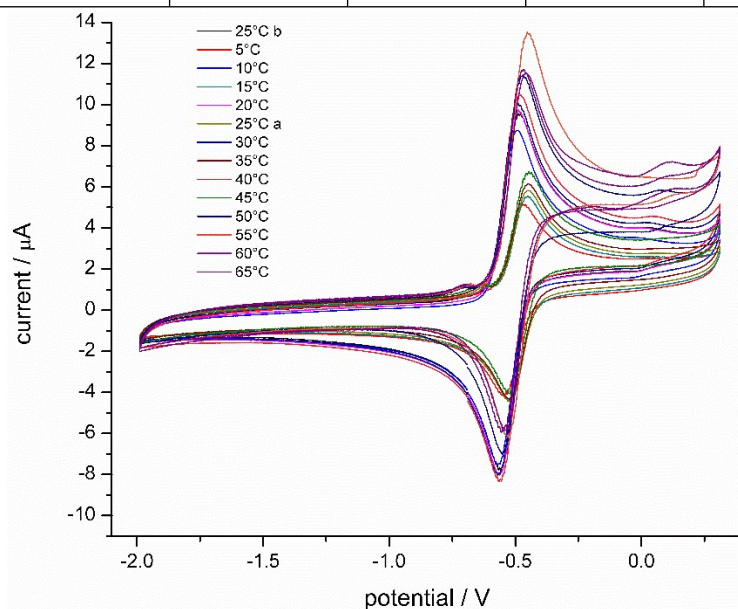

Figure S1. First measurement cyclic voltammograms of  $(\text{Et}_4\text{N})_2[\text{IIa}]$  at various temperatures between 5°C and 65°C in  $\text{CH}_3\text{CN}$  (0.1 mol/l  $\text{Bu}_4\text{NPF}_6$ ). Data is referenced against  $\text{Fc}/\text{Fc}^+$  (= 0 V in this diagram).

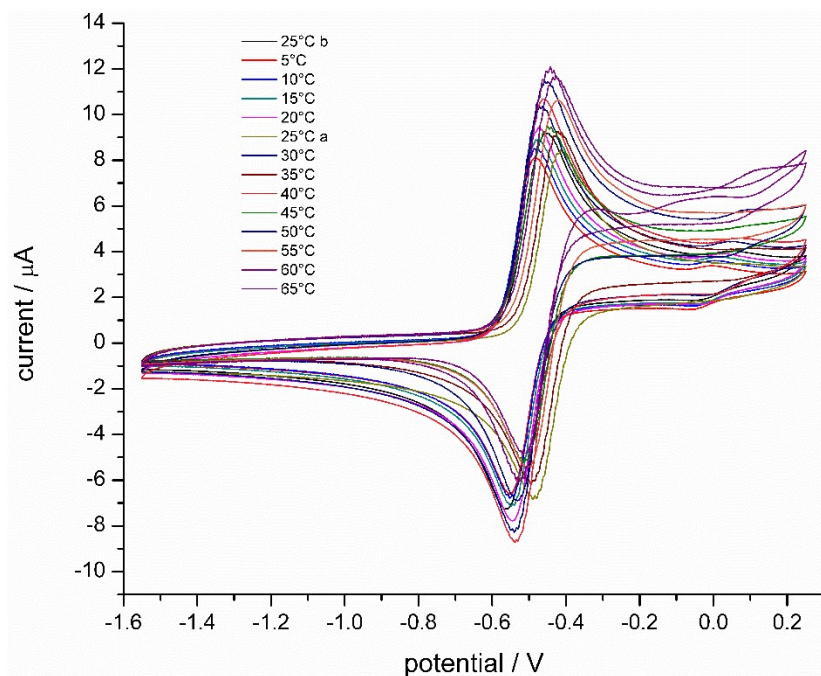

Figure S2. Second measurement cyclic voltammograms of  $(\text{Et}_4\text{N})_2[\text{Ila}]$  at various temperatures between 5°C and 65°C in  $\text{CH}_3\text{CN}$  (0.1 mol/l  $\text{Bu}_4\text{NPF}_6$ ). Data is referenced against  $\text{Fc}/\text{Fc}^+$  (= 0 V in this diagram).

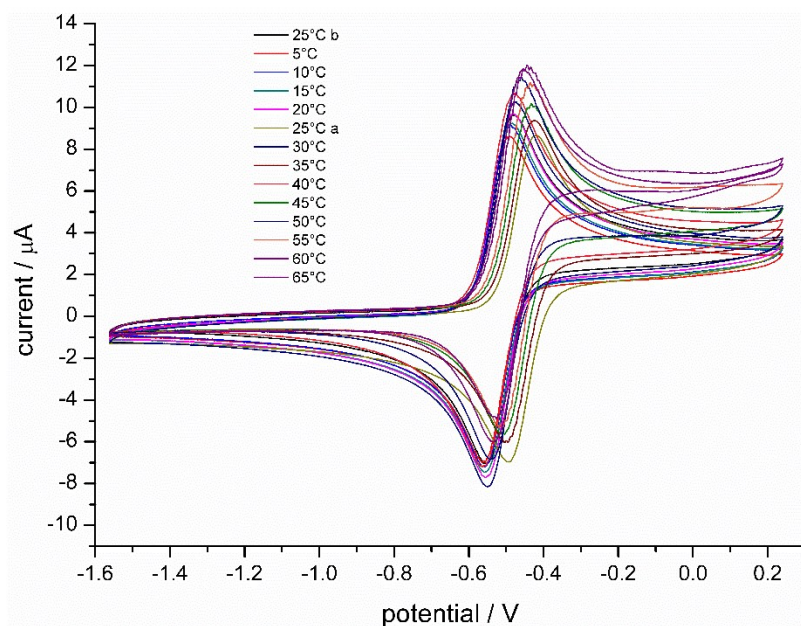

Figure S3. Third measurement cyclic voltammograms of  $(\text{Et}_4\text{N})_2[\text{Ila}]$  at various temperatures between 5°C and 65°C in  $\text{CH}_3\text{CN}$  (0.1 mol/l  $\text{Bu}_4\text{NPF}_6$ ). Data is referenced against  $\text{Fc}/\text{Fc}^+$  (= 0 V in this diagram).

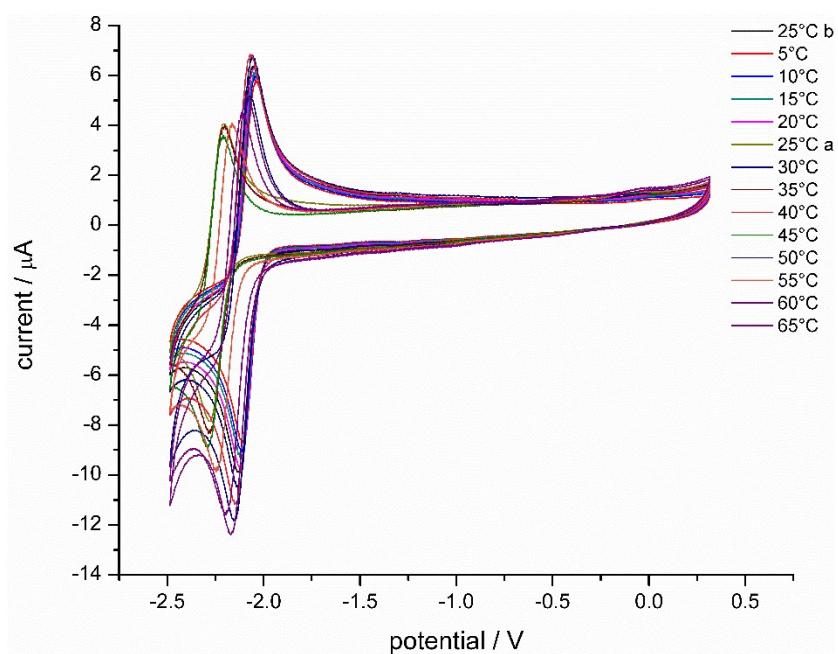

Figure S4. First measurement cyclic voltammograms of K[I1b] at various temperatures between 5°C and 65°C in CH<sub>3</sub>CN (0.1 mol/l Bu<sub>4</sub>NPF<sub>6</sub>). Data is referenced against Fc/Fc<sup>+</sup> (= 0 V in this diagram).

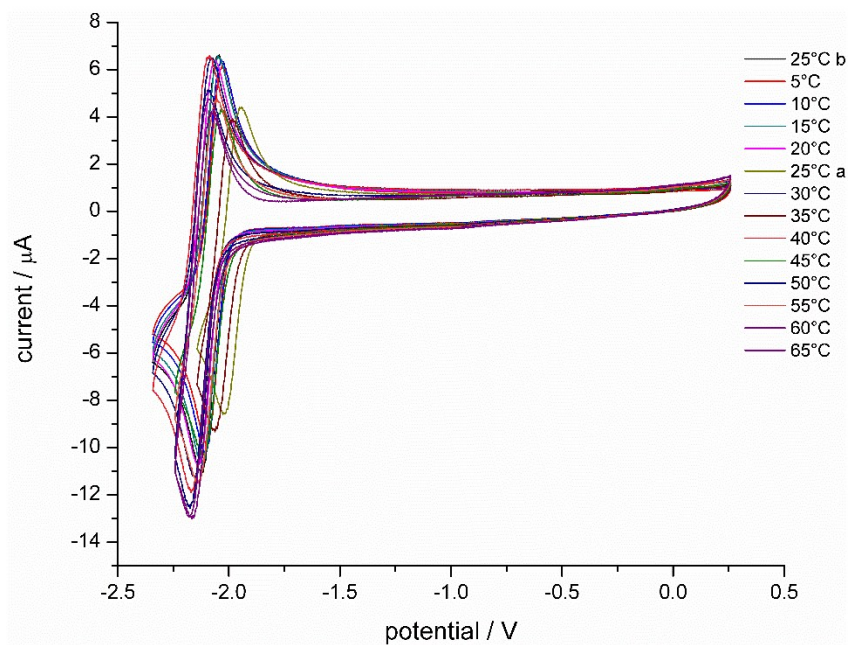

Figure S5. Second measurement cyclic voltammograms of K[I1b] at various temperatures between 5°C and 65°C in CH<sub>3</sub>CN (0.1 mol/l Bu<sub>4</sub>NPF<sub>6</sub>). Data is referenced against Fc/Fc<sup>+</sup> (= 0 V in this diagram).

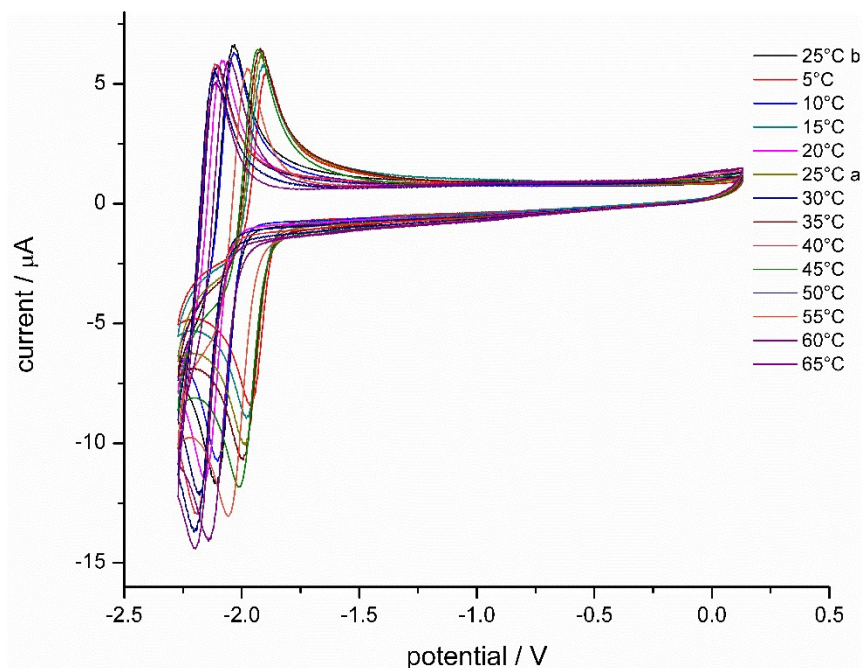

Figure S6. Third measurement cyclic voltammograms of K[IIb] at various temperatures between 5°C and 65°C in CH<sub>3</sub>CN (0.1 mol/l Bu<sub>4</sub>NPF<sub>6</sub>). Data is referenced against Fc/Fc<sup>+</sup> (= 0 V in this diagram).

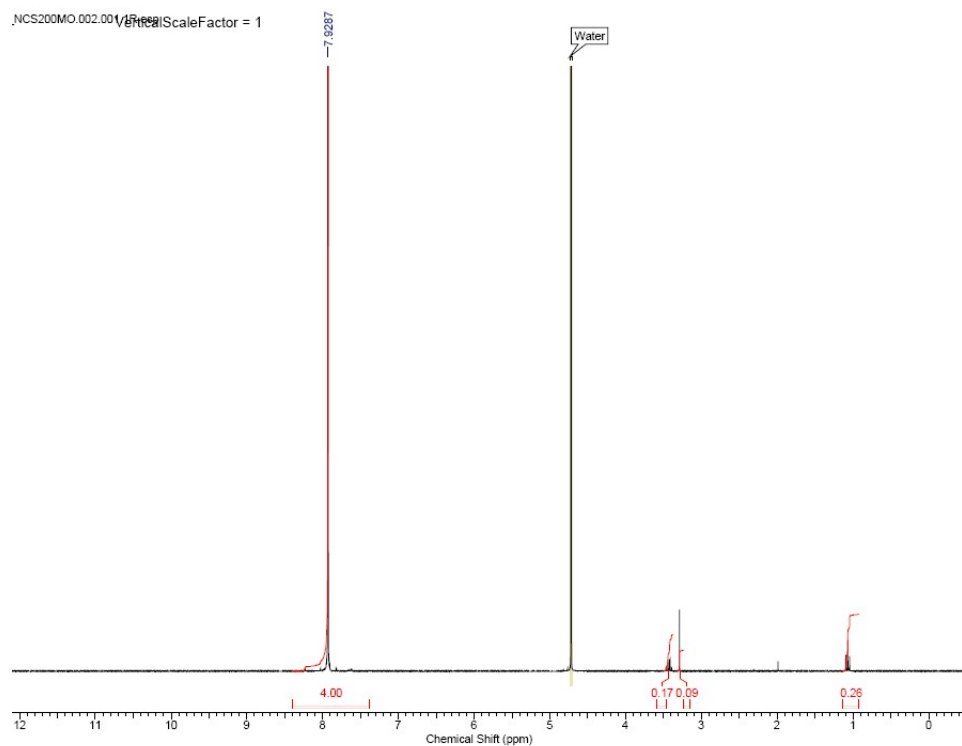

Figure S7. The 300 MHz <sup>1</sup>H NMR spectrum of compound K<sub>2</sub>[IIa] in D<sub>2</sub>O.



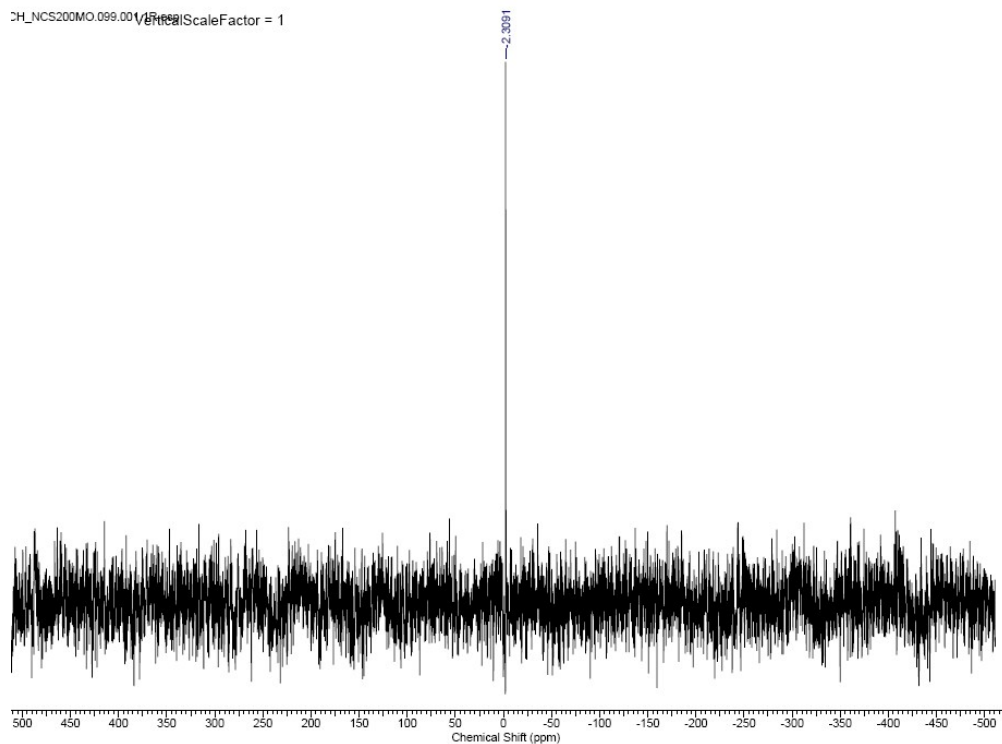

Figure S8. The 19.56 MHz  $^{95}\text{Mo}$ -NMR spectrum of compound  $\text{K}_2[\text{Ila}]$  in  $\text{D}_2\text{O}$ .

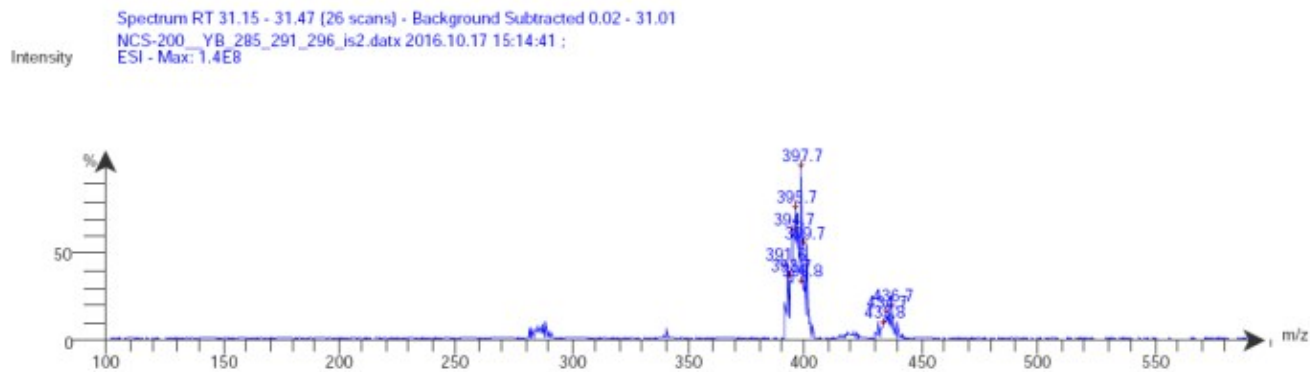

Figure S9. ESI MS spectrum from dissolution of  $\text{K}_2[\text{MoO}(\text{pdt})_2]$  ( $\text{K}_2[\text{Ila}]$ ) in methanol showing its adduct  $[\text{C}_8\text{H}_4\text{N}_4\text{OMoS}_4]^{2-}$  at 397.8 m/e and  $[\text{C}_8\text{H}_4\text{N}_4\text{OMoS}_4]^{2-}\text{K}^+$  at 436.7 m/e.

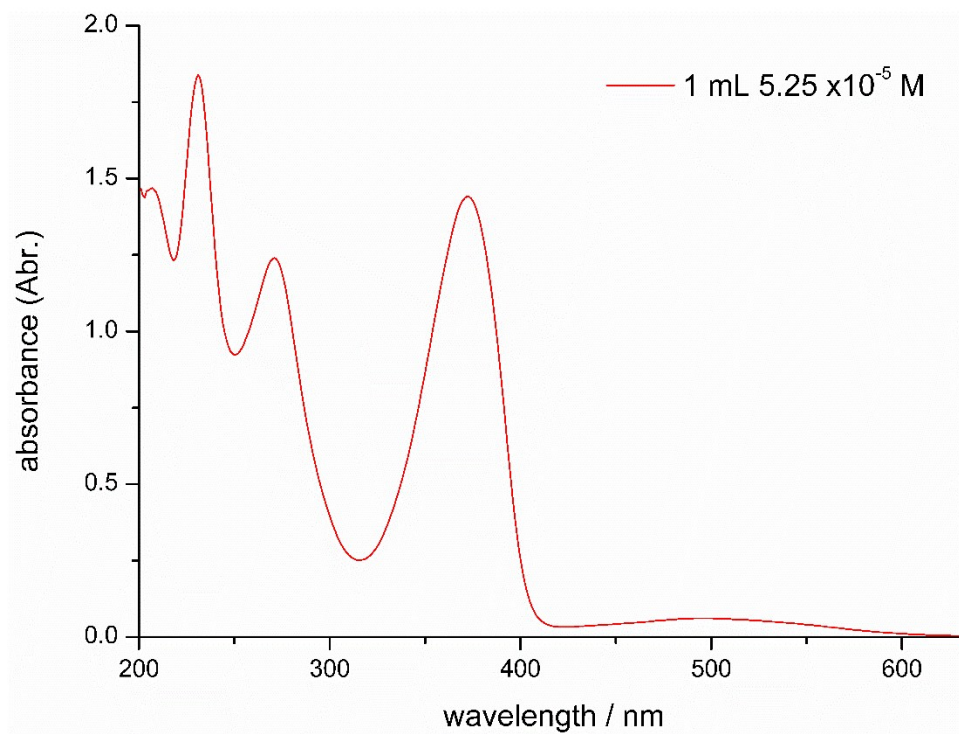

Figure S10. UV-Vis spectrum of compound  $K_2[MoO(pdt)_2]$  ( $K_2[IIa]$ ) in methanol at 25°C.

01.16 VerticalScaleFactor = 1

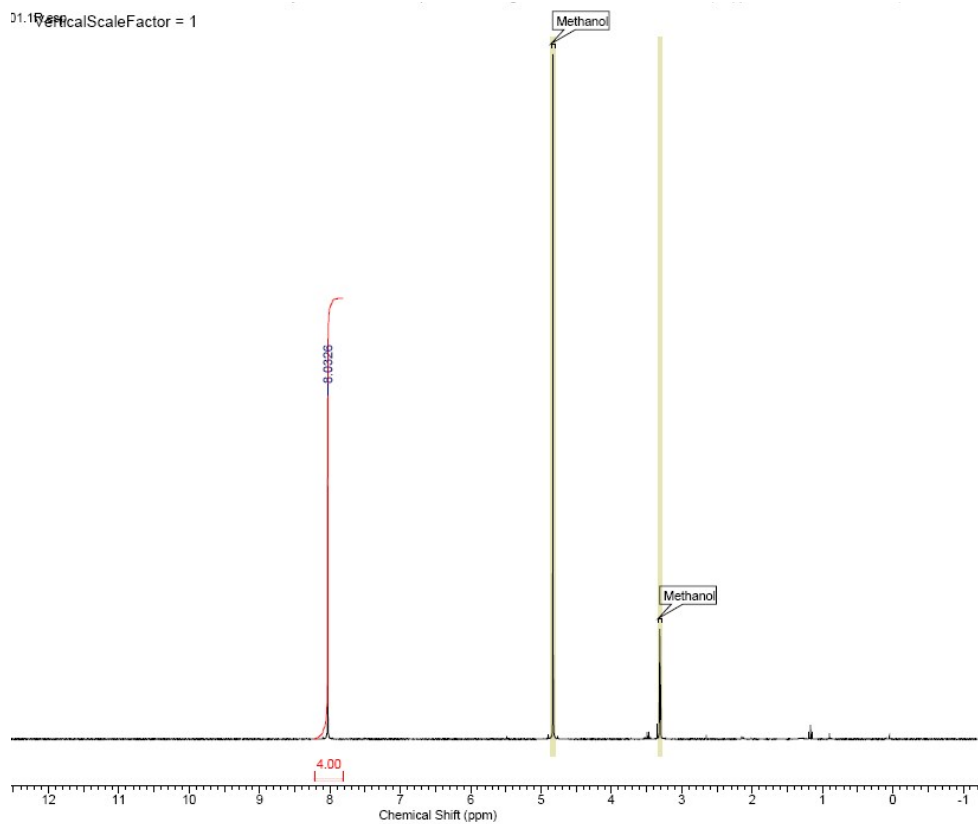

Figure S11. The 300 MHz <sup>1</sup>H NMR spectrum of compound K[IIb] in CD<sub>3</sub>OD.

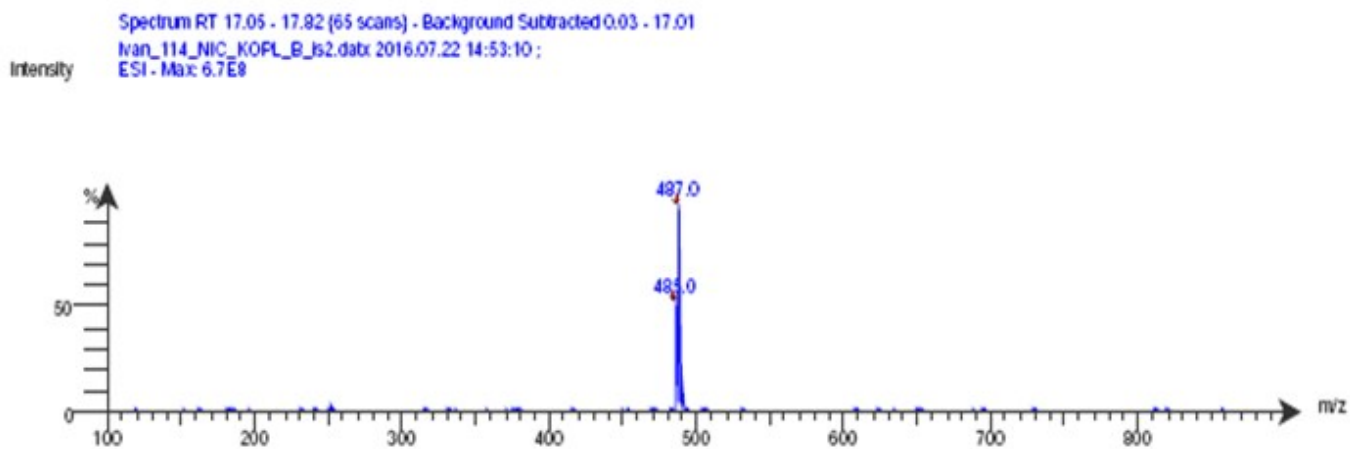

Figure S12. ESI MS spectrum from dissolution of K[ReO(pdt)<sub>2</sub>] (K[IIb]) in methanol showing its adduct [C<sub>8</sub>H<sub>4</sub>N<sub>4</sub>OReS<sub>4</sub>]<sup>-</sup> at 486.6 m/e.



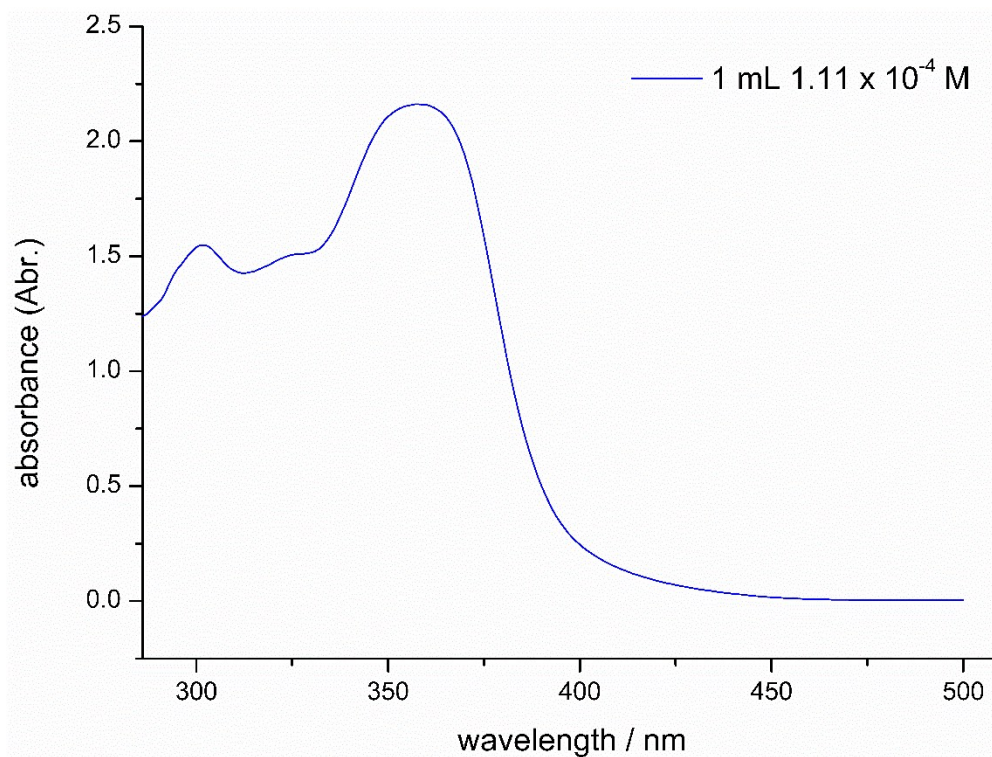

Figure S13. UV-Vis spectrum of compound  $K[ReO(pdt)_2]$  (K[Ilb]) in methanol at 25°C.

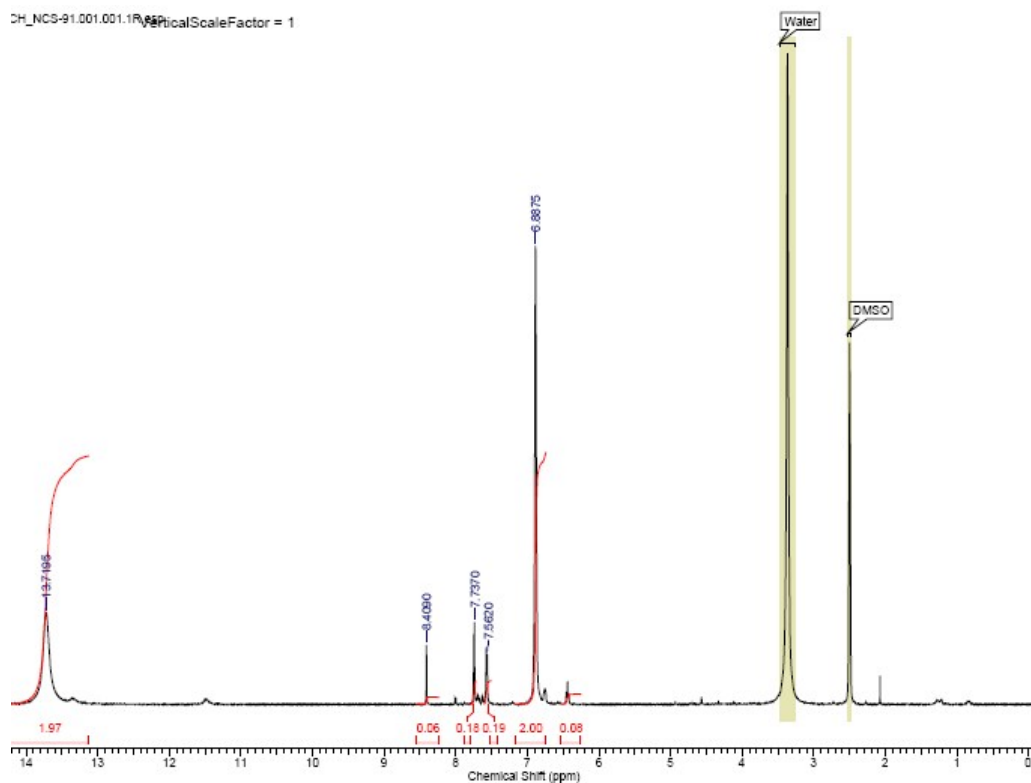

Figure S14. The 300 MHz  $^1H$  NMR spectrum of compound I in DMSO-D6.

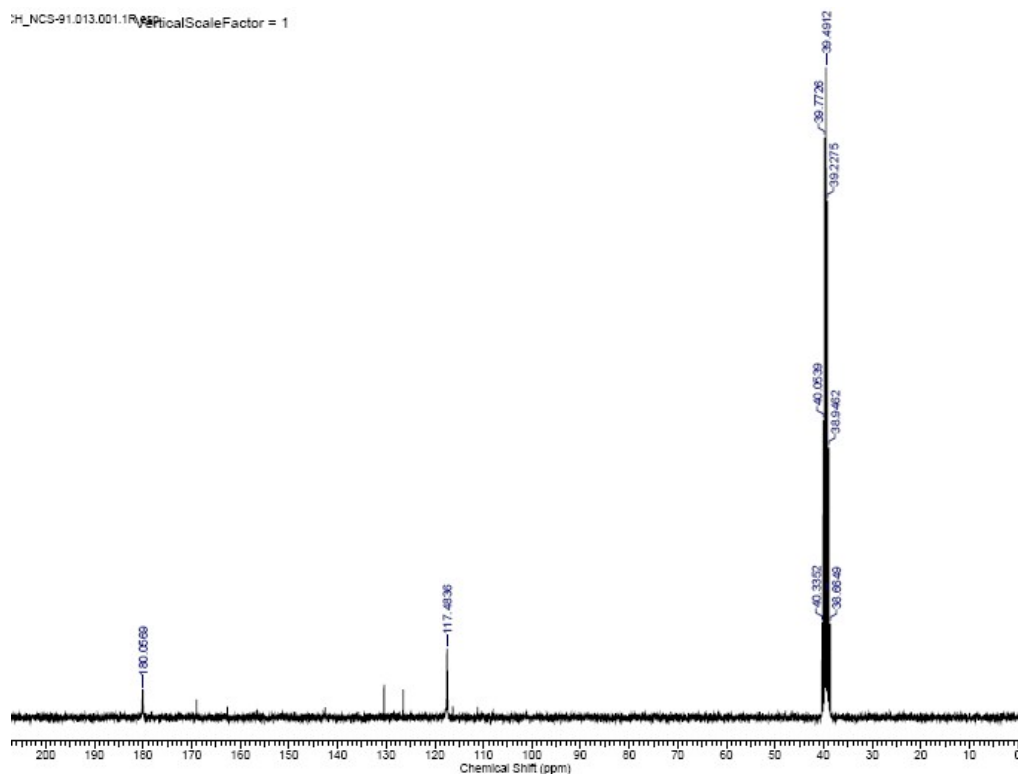

Figure S15. The 75.5 MHz  $^{13}\text{C}$  NMR spectrum of compound I in DMSO- $\text{D}_6$ .

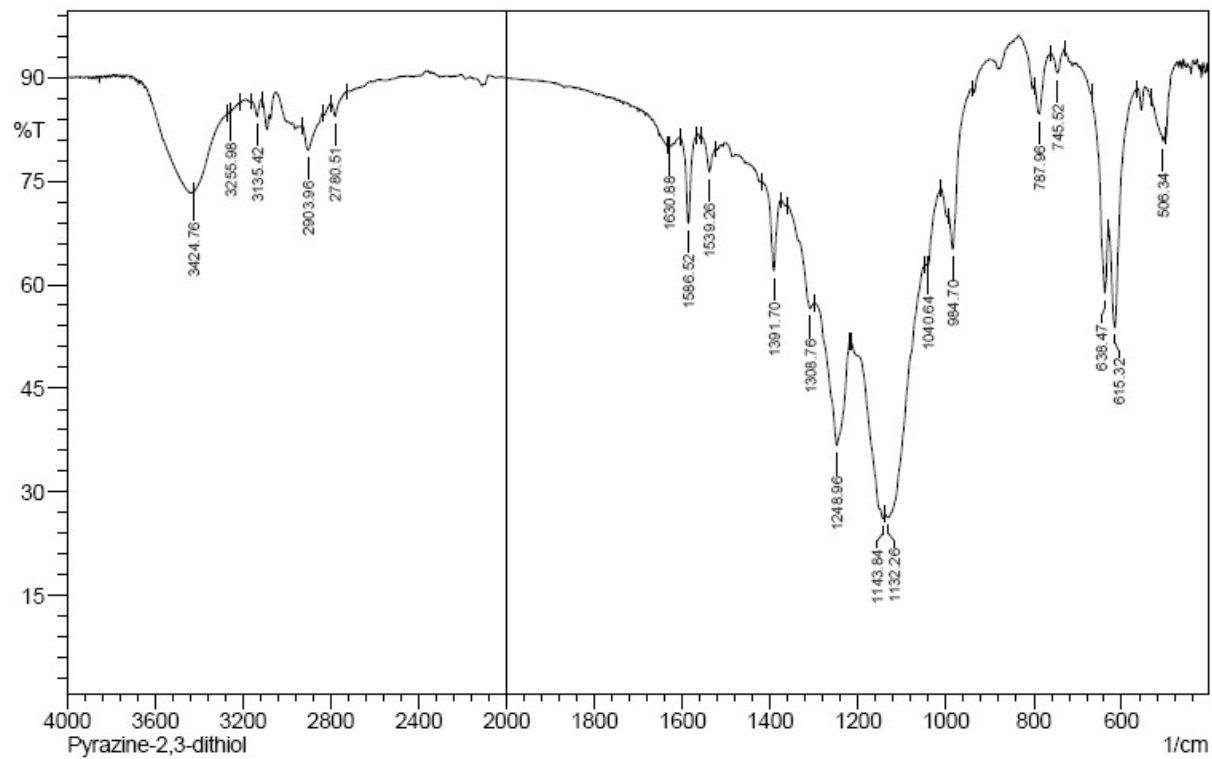

Figure S16. The IR spectrum of compound I.

Table S2 Metrical hydrogen bond parameters in (Et<sub>4</sub>N)<sub>2</sub>[IIa]. In red: hydrogen bonds involving the terminal oxido ligand (Mo=O).

| D-H...A               | d(D-H) / Å | d(H...A) / Å | d(D...A) / Å | <(DHA) / ° |
|-----------------------|------------|--------------|--------------|------------|
| C(4)-H(4)...S(1)#1    | 0.95       | 3.00         | 3.755(4)     | 1380       |
| C(4)-H(4)...S(3)#1    | 0.95       | 2.75         | 3.633(4)     | 1544       |
| C(8)-H(8)...S(2)#2    | 0.95       | 2.91         | 3.614(4)     | 1323       |
| C(8)-H(8)...S(4)#2    | 0.95       | 2.83         | 3.543(4)     | 1321       |
| C(9)-H(9A)...S(2)#3   | 0.99       | 3.02         | 3.959(5)     | 1596       |
| C(10)-H(10A)...O(1)   | 0.98       | 2.62         | 3.404(6)     | 1374       |
| C(11)-H(11A)...S(4)#3 | 0.99       | 2.87         | 3.855(4)     | 1742       |
| C(12)-H(12C)...S(2)#2 | 0.98       | 3.00         | 3.729(5)     | 1319       |
| C(13)-H(13A)...N(2)#2 | 0.99       | 2.53         | 3.463(5)     | 1580       |
| C(14)-H(14B)...O(2)#4 | 0.98       | 2.48         | 3.433(6)     | 1651       |
| C(15)-H(15B)...S(4)   | 0.99       | 3.01         | 3.930(5)     | 1543       |
| C(17)-H(17B)...O(1)#5 | 0.99       | 2.60         | 3.510(5)     | 1527       |
| C(19)-H(19B)...S(2)   | 0.99       | 2.97         | 3.915(5)     | 1608       |
| C(20)-H(20B)...N(4)#6 | 0.98       | 2.67         | 3.409(7)     | 1321       |
| C(21)-H(21B)...O(1)#5 | 0.99       | 2.57         | 3.498(5)     | 1560       |
| C(23)-H(23A)...N(2)   | 0.99       | 2.67         | 3.646(6)     | 1690       |
| O(2)-H(1O2)...N(3)#1  | 0.88(6)    | 2.29(6)      | 3.152(6)     | 167(6)     |
| O(2)-H(2O2)...N(1)    | 0.88(6)    | 2.10(6)      | 2.968(5)     | 171(8)     |

Symmetry transformations used to generate equivalent atoms: #1 -x,y+1/2,-z+1, #2 -x+1,y-1/2,-z+2, #3 x+1,y,z, #4 x+1,y,z+1, #5 -x+1,y+1/2,-z+1, #6 -x+1,y+1/2,-z+2

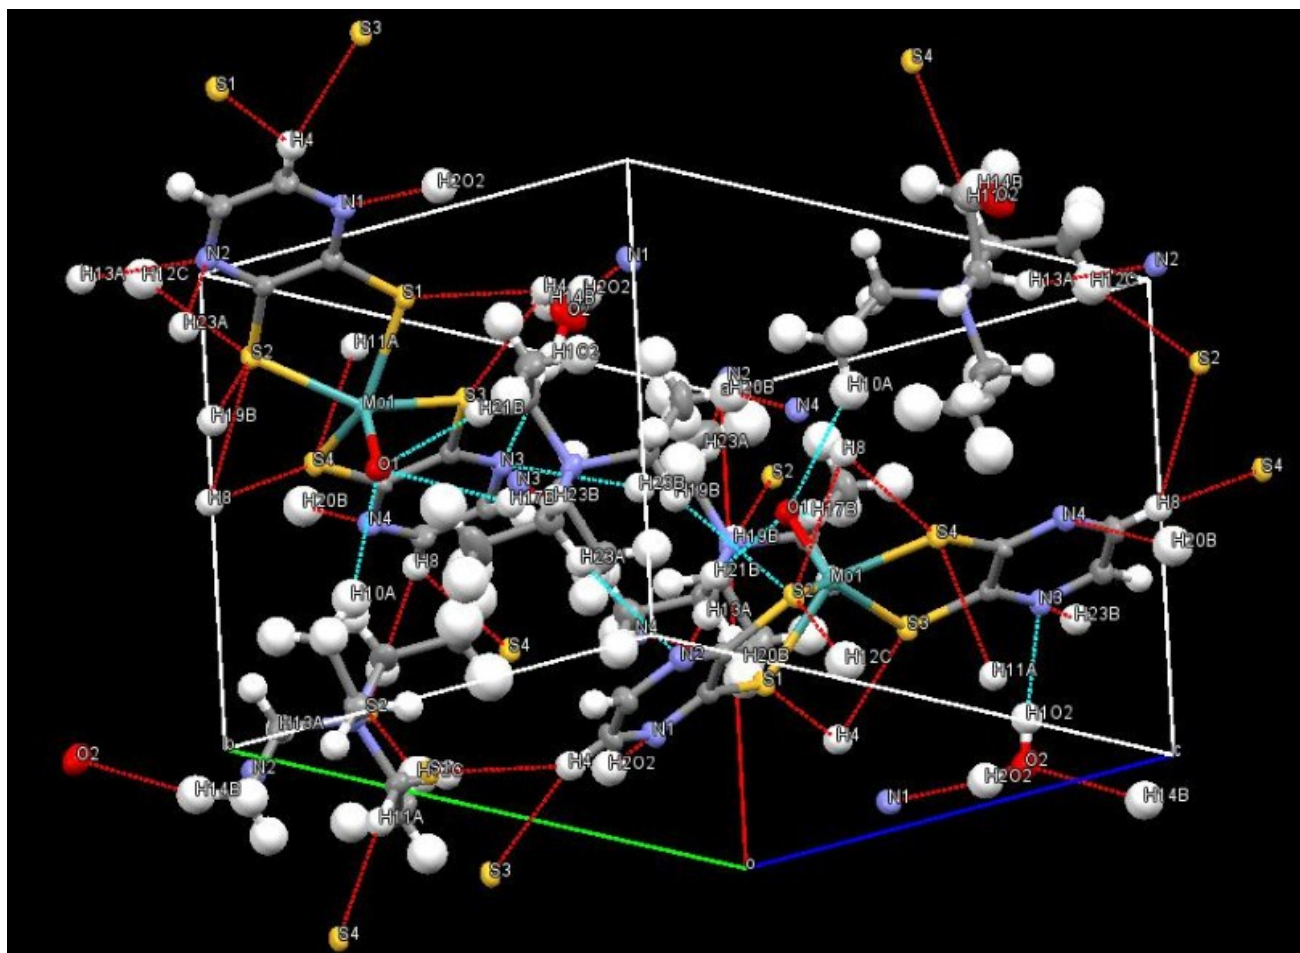

Figure S17. Uni-cell packing of compound  $(Et_4N)_2[Ila]$  with hydrogen bonds shown as dashed lines.

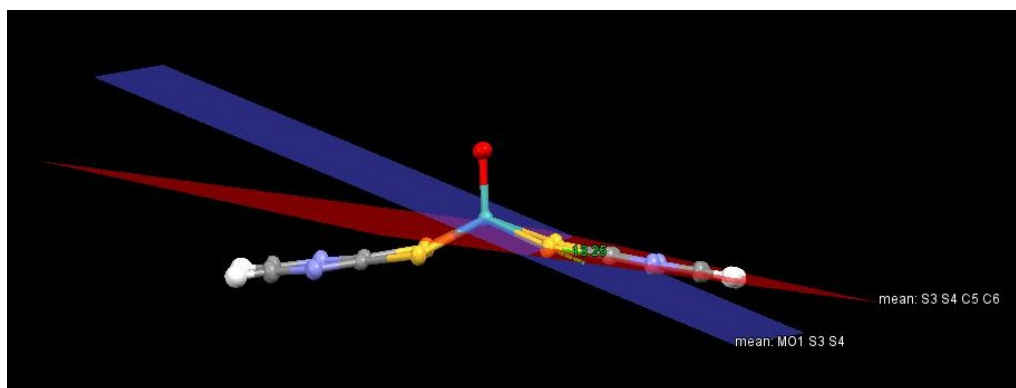

Figure S18. Fold angle  $\alpha$  of compound  $(Et_4N)_2[Ila]$ .

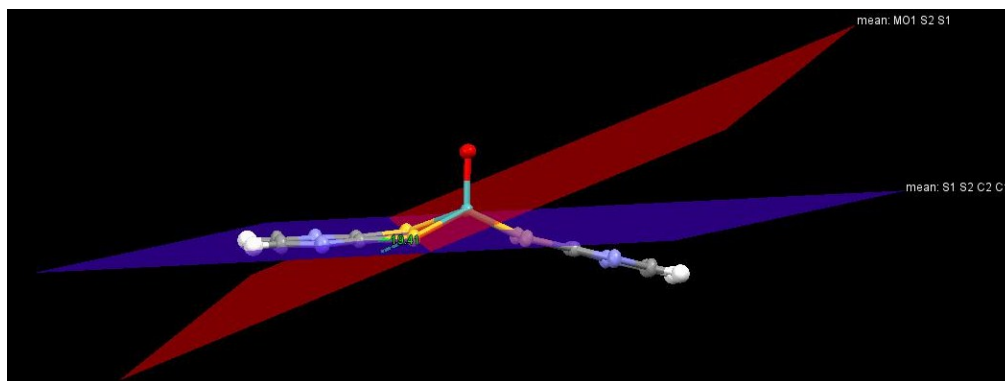

Figure S19. Fold angle  $b$  of compound  $(Et_4N)_2[IIa]$ .

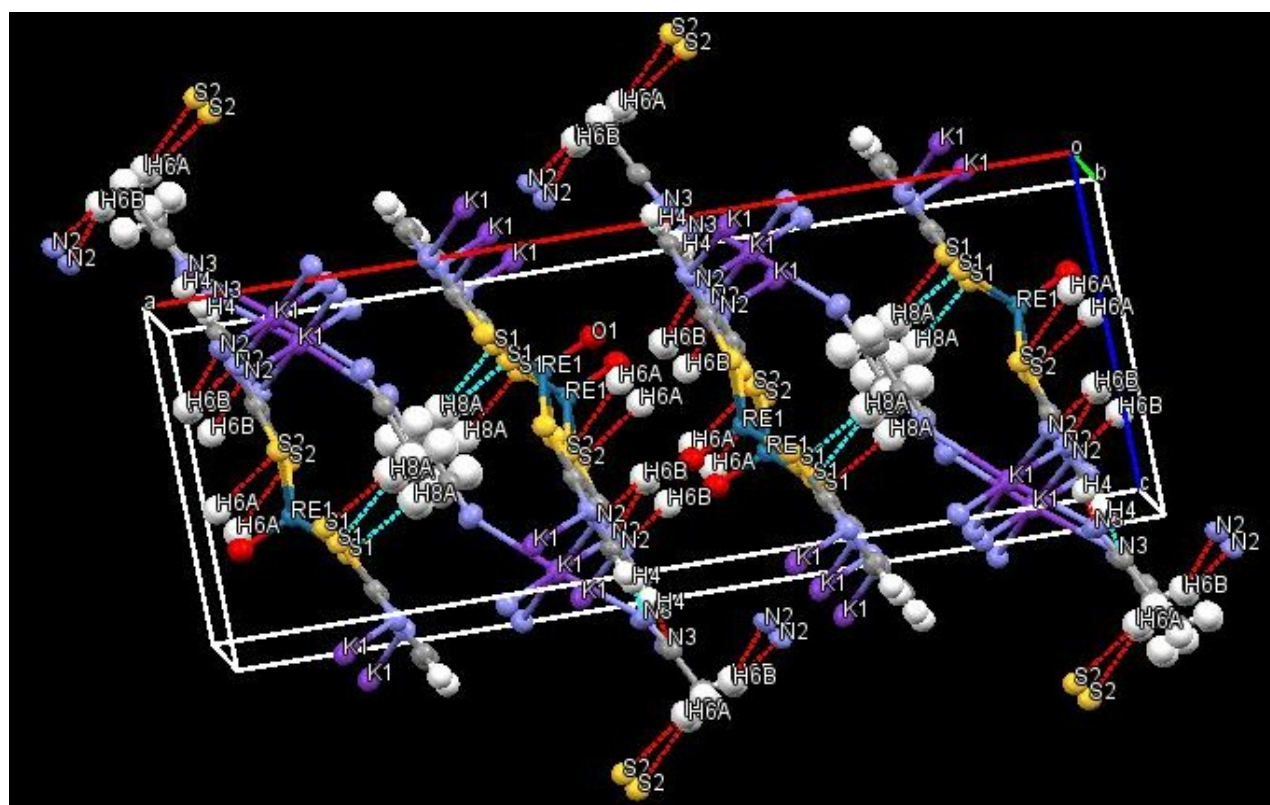

Figure S20. Unit-cell packing of compound  $K[IIb]$  with hydrogen bonds shown as dashed lines.





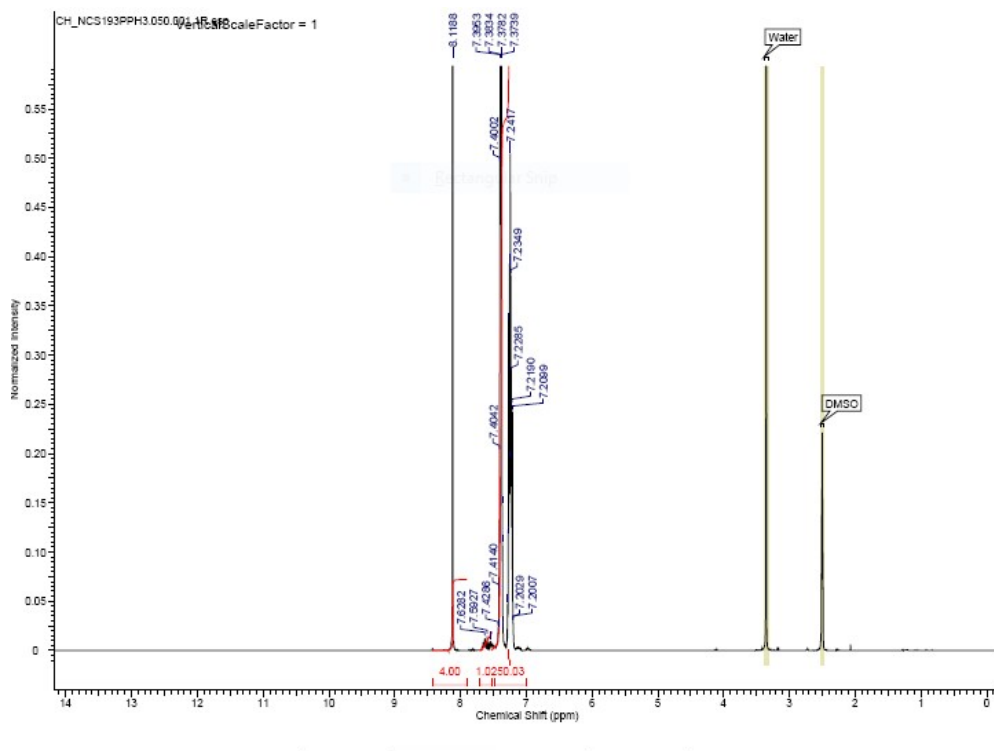

Figure S22. The 300 MHz  $^1\text{H}$  NMR spectrum of compound K[IIb] with 2.5 eq. of  $\text{PPh}_3$  in DMSO- $\text{D}_6$  after 90 h of catalysis.

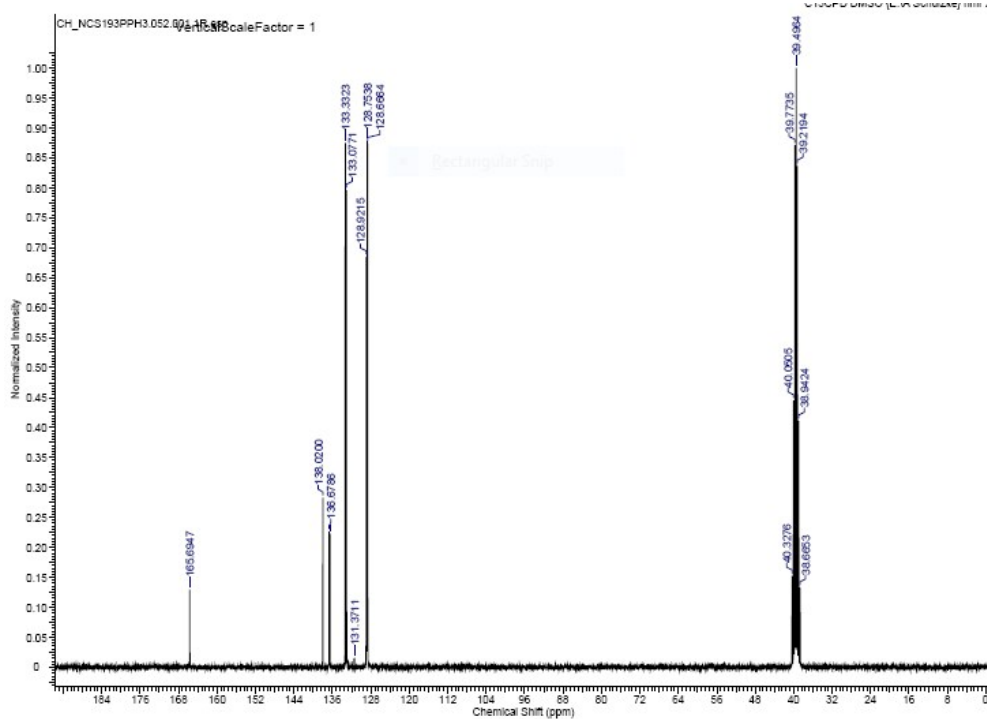

Figure S23. The 75.5 MHz  $^{13}\text{C}$  NMR spectrum of compound K[IIb] with 2.5 eq. of  $\text{PPh}_3$  in DMSO-D6 after 90 h of catalysis.

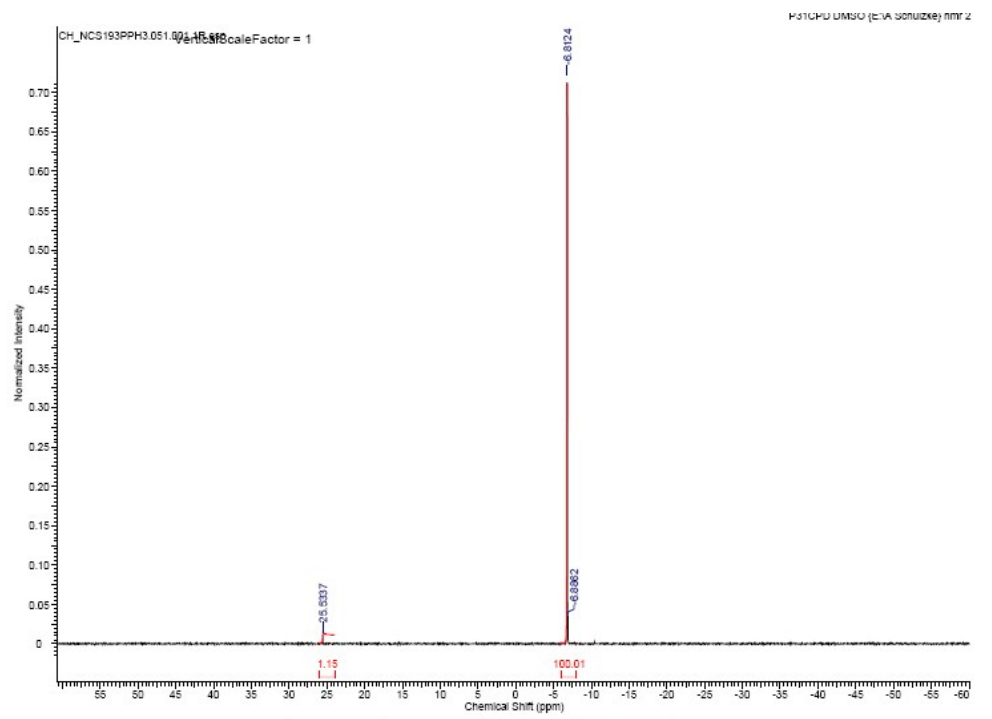

Figure S24. The  $^{31}\text{P}$  NMR spectrum of compound K[IIb] with 2.5 eq. of  $\text{PPh}_3$  in DMSO-D6 after 90 h of catalysis

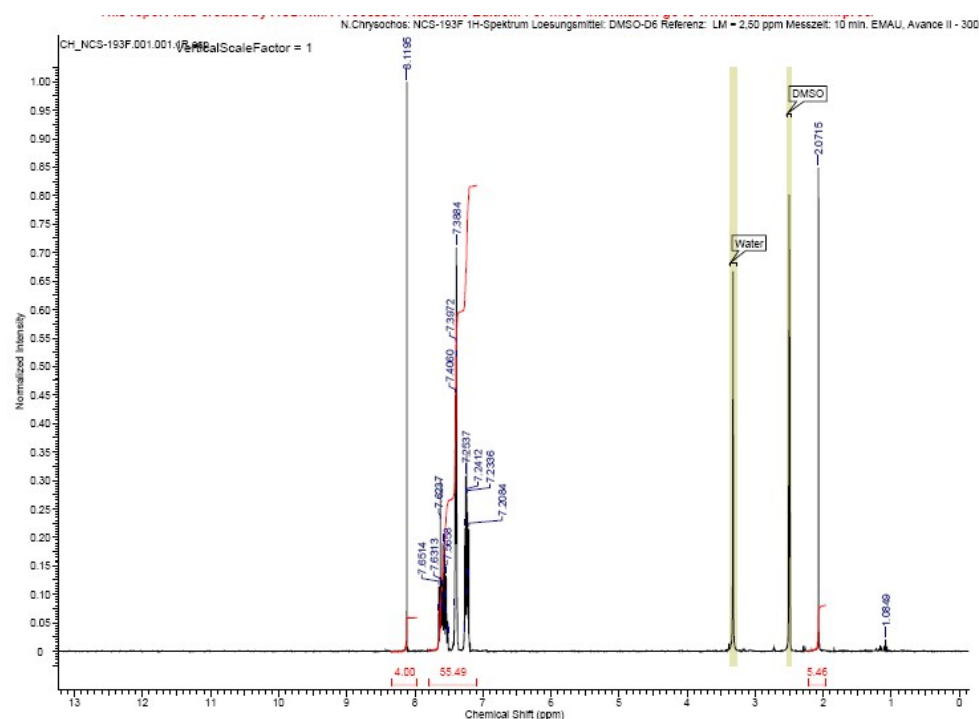

Figure S25. The 300 MHz  $^1\text{H}$  NMR spectrum of compound K[IIb] with 2.5 eq. of  $\text{PPh}_3$  in  $\text{DMSO-D}_6$  after 73 d or termination of catalytic experiment.

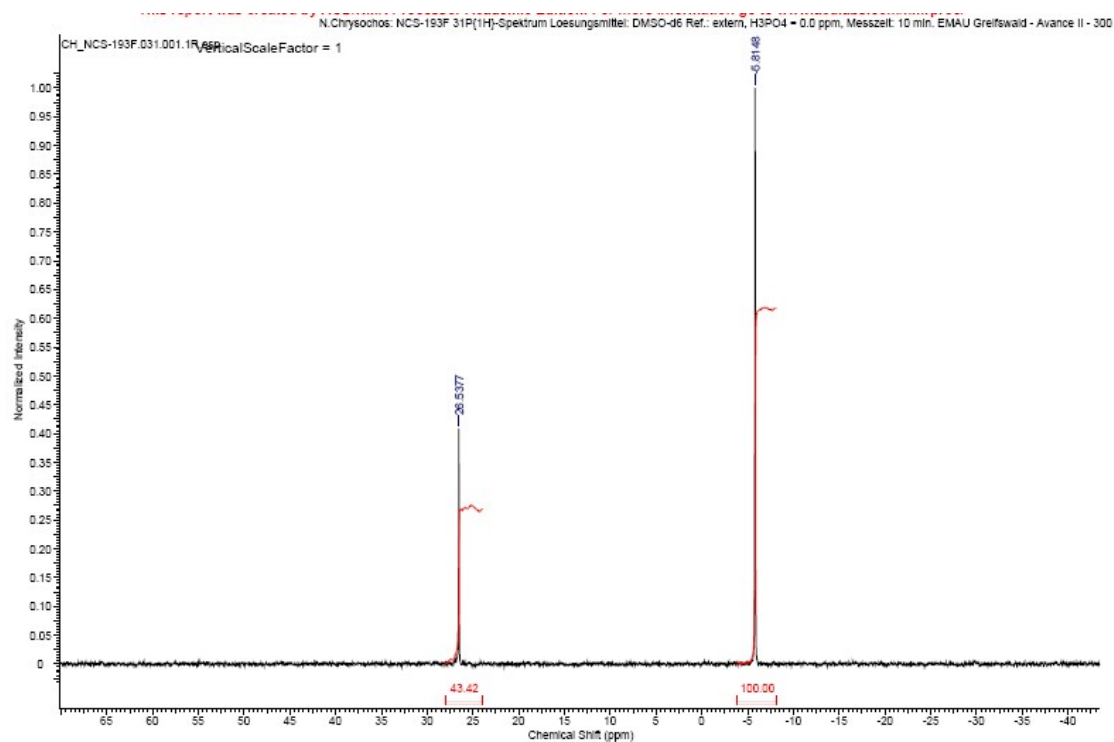

Figure S26. The  $^{31}\text{P}$  NMR spectrum of compound K[IIb] with 2.5 eq. of  $\text{PPh}_3$  in  $\text{DMSO-D}_6$  after 73 d (i.e. at termination) of catalytic experiment.
